# Supplementary material for: Effect of Electrical Muscular Stimulation on Occupational Activates: a Systematic Review and Meta-Analysis
Source: Research Square preprint supplement (doi:10.21203/rs.3.rs-3140703/v1), 2023-07-06
Supplement: Supplementary file 1 [file 7c28db79f7d85e937e4a4c1f.docx]

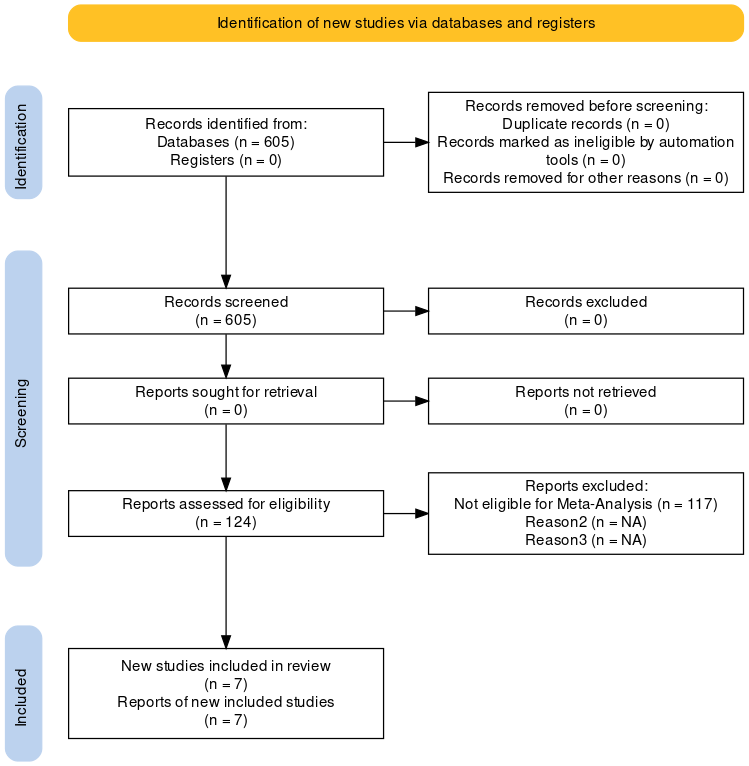


Figure 1. Flow graph of included and excluded studies(placed at the end of **Description of studies** section)


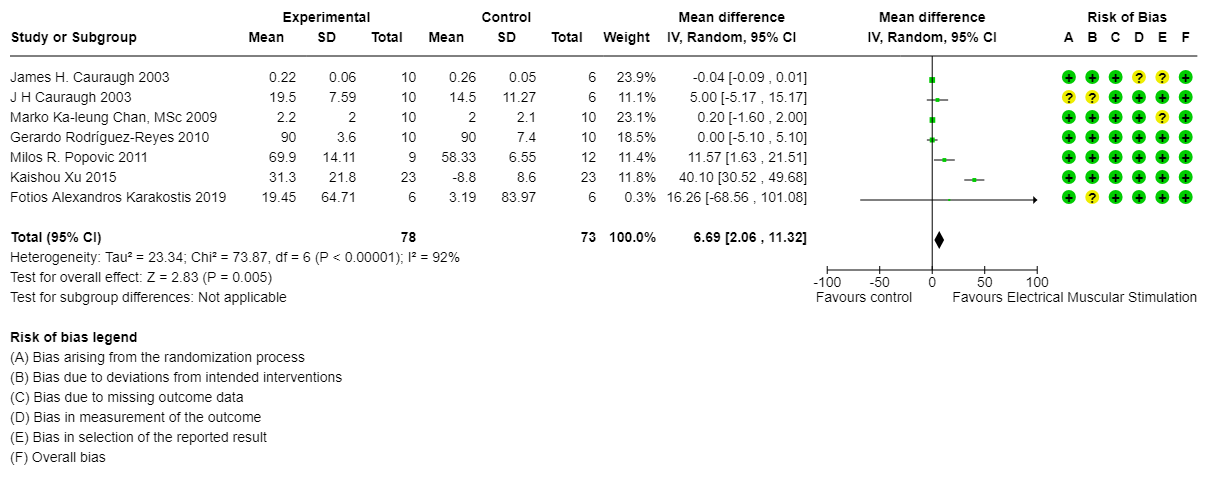


Figure 2. Forest plot and risk of bias for seven studies include the comparison between them(placed at the end of **Effects of interventions** section)
